# Supplementary material for: TrmL and TusA Are Necessary for rpoS and MiaA Is Required for hfq Expression in Escherichia coli
Source: Biomolecules. 2017 May 4;7(2):39. doi: 10.3390/biom7020039 (PMC5485728; doi:10.3390/biom7020039)
Supplement: Supplementary File 1 [file biomolecules-07-00039-s001.xlsx]

## Sheet: Table S1 - Strains and Plasmids
Table 1 - Strain list
Strain	Genotype	Source
MG1655
DJ480	MG1655 lacX74
EM1050	DJ480 rpoS750-lacZ
KMT194	DJ480 mini-l-tet
KMT766	DJ480 rpoS750-lacZ ∆tusA::zeo	EM1050 x P1(∆tusA::Zeo)
KMT767	DJ480 rpoS750-lacZ ∆trmL::zeo	EM1050 x P1(∆trmL::Zeo)
KMT283	MG1655 DrssB::tet	Obtained from Alexander Bougdour, PhD
KMT592	DJ480 DmiaA2::zeo	E. coli DJ480 mini-l::tet induced + DmiaA2::zeo PCR
KMT670	MG1655 ∆tusA::zeo	MG1655 x P1(∆tusA::Zeo)
KMT681	MG1655 ∆trmL::zeo	MG1655 x P1(∆trmL::Zeo)
KMT30000	MG1655 DaraBAD, araC+, mal::lacIq f80- lacI::PBAD-rpoS990-lacZ translational fusion	PM1805 x PBAD-rpoS990-lacZ PCR () on M63-glycerol-sucrose XG
KMT30003	MG1655 DaraBAD, araC+, mal::lacIq f80- lacI::PBAD-rpoS990-lacZ translational fusion DrssB::tet	KMT30000 x P1 (KMT283 - DrssB::tet)
KMT30038	MG1655 DaraBAD, araC+, mal::lacIq f80- lacI::PBAD-rpoS990-lacZ translational fusion DrssB::tet ΔtrmL::zeo	KMT30003 x P1(∆trmL::zeo)
KMT30044	MG1655 DaraBAD, araC+, mal::lacIq f80- lacI::PBAD-rpoS990-lacZ translational fusion DrssB::tet ΔtusA::zeo	KMT30003 x P1(∆tusA::zeo)
KMT33000	MG1655 DaraBAD, araC+, mal::lacIq f80- lacI::PBAD-rpoS990(ML-)-lacZ translational fusion (#2)	PM1805 x PBAD-rpoS990(leu*3)-lacZ PCR on M63-glycerol-sucrose XG
KMT33001	MG1655 DaraBAD, araC+, mal::lacIq f80- lacI::PBAD-rpoS990(ML-)-lacZ translational fusion (#2) ΔrssB::tet	KMT33000 x P1 (KMT283 - DrssB::tet)
KMT33013	MG1655 DaraBAD, araC+, mal::lacIq f80- lacI::PBAD-rpoS990(ML-)-lacZ translational fusion (#2) ΔrssB::tet ΔtrmL::zeo	KMT33001 x P1 (KMT283 - DtrmL::zeo)
KMT36000	MG1655 DaraBAD, araC+, mal::lacIq f80- lacI::PBAD-rpoS990(leu*1)-lacZ translational fusion	PM1805 x PBAD-rpoS990(leu*1)-lacZ PCR on M63-glycerol-sucrose XG
KMT36002	MG1655 DaraBAD, araC+, mal::lacIq f80- lacI::PBAD-rpoS990(leu*1)-lacZ translational fusion rssB::tet	KMT36000 x P1 (KMT283 - ΔrssB::tet)
KMT36010	MG1655 DaraBAD, araC+, mal::lacIq f80- lacI::PBAD-rpoS990(leu*1)-lacZ translational fusion rssB::tet ΔtrmL::zeo	KMT36002 x P1 (KMT283 - ΔtrmL::zeo)
KMT37000	MG1655 DaraBAD, araC+, mal::lacIq f80- lacI::PBAD-rpoS990(leu*2)-lacZ translational fusion	PM1805 x PBAD-rpoS990(leu*2)-lacZ PCR on M63-glycerol-sucrose XG
KMT37002	MG1655 DaraBAD, araC+, mal::lacIq f80- lacI::PBAD-rpoS990(leu*2)-lacZ translational fusion rssB::tet	KMT37000 x P1 (KMT283 - ΔrssB::tet)
KMT37010	MG1655 DaraBAD, araC+, mal::lacIq f80- lacI::PBAD-rpoS990(leu*2)-lacZ translational fusion rssB::tet ΔtrmL::zeo	KMT37002 x P1 (KMT283 - ΔtrmL::zeo)
KMT38000	MG1655 DaraBAD, araC+, mal::lacIq f80- lacI::PBAD-hfq306-lacZ translational fusion	PM1805 x PBAD-hfq306-lacZ PCR on M63-glycerol-sucrose XG
KMT38002	MG1655 DaraBAD, araC+, mal::lacIq f80- lacI::PBAD-hfq306-lacZ translational fusion ΔmiaA::zeo	KMT38000 x P1 (ΔmiaA::zeo)
KMT38004	MG1655 DaraBAD, araC+, mal::lacIq f80- lacI::PBAD-hfq306-lacZ translational fusion ΔtrmL::zeo	KMT38000 x P1 (ΔtrmL::zeo)
PM1805	MG1655 lacI::PBAD:cat-sacB:lacZ, DaraBAD, araC+, mal::lacIq, miniltet f80-	Obtained from Nadim Majdalani, PhD
