# Supplementary material for: TrmL and TusA Are Necessary for rpoS and MiaA Is Required for hfq Expression in Escherichia coli
Source: Biomolecules. 2017 May 4;7(2):39. doi: 10.3390/biom7020039 (PMC5485728; doi:10.3390/biom7020039)
Supplement: Supplementary File 2 [file biomolecules-07-00039-s002.xlsx]

## Sheet: Table S2 - Oligonucleotide
Table 2 - Oligonucleotide list
Oligonucleotide number	Sequence	Description
KT1160	AcctgacgctttttatcgcaactctctactgtttctccatAAAAGAGAGAatgGCTAAGG	forward primer for amplification of PBAD-hfq306-lacZ
KT1161	CGCCAGGGTTTTCCCAGTCACGACGTTGTAAAACGACGGCTTCGGTTTCTTCGCTGTCCT	reverse primer for amplification of PBAD-hfq306-lacZ
KT1188	GCAATCGTTAACCTAGTTTGCTTACGGACTCACAGGGCGT CACGTGTTGACAATTAATCA	ΔtusA::zeo forward mutagenesis primer
KT1189	GCAAACCGATCGCAACATTGAGCGCGATCGGTCCCCTCGC TCAGTCCTGCTCCTCGGCCA	ΔtusA::zeo reverse mutagenesis primer
KT1190	GCAATCGTTAACCTAGTTTGC	ΔtusA::zeo forward screening primer
KT1191	GCATCTAGAGCAAACCGATCGCAACATTG	ΔtusA::zeo reverse screening primer
KT1192	atgCTAAACATCGTACTTTACGAACCAGAAATTCCGCCAA CACGTGTTGACAATTAATCA	ΔtrmL::zeo forward mutagenesis primer
KT1193	GTGCCGGATGCGATGTAATCATCTATCCGGCCTACAGTAA TCAGTCCTGCTCCTCGGCCA	ΔtrmL::zeo reverse mutagenesis primer
KT1194	GCACTAAGGGGGCAGTatgCTAAA	ΔtrmL::zeo forward screening primer
KT1195	GCATCTAGAGTGCCGGATGCGATGTAATC	ΔtrmL::zeo reverse screening primer primer
